# Supplementary material for: Metagenome-Assembled Genomes From Pyropia haitanensis Microbiome Provide Insights Into the Potential Metabolic Functions to the Seaweed
Source: Front Microbiol. 2022 Mar 23;13:857901. doi: 10.3389/fmicb.2022.857901 (PMC8984609; doi:10.3389/fmicb.2022.857901)
Supplement: Supplementary Table 1 — Taxonomy and statistics of the IMG/M database with Pyropia symbiont genomes included in the concatenated marker gene tree. The GTDB R89 taxonomy is presented. [file Table_1.XLSX]

## Sheet: Sheet1
IMG Genome ID	Bin ID	GTDBtk Lineage	Bin Completeness	Bin Contamination	Total Number of Bases	5s rRNA	16s rRNA	23s rRNA	tRNA Genes	Gene Count	Scaffold Count
2509276000	2509276000	d__Bacteria;p__Planctomycetota;c__Planctomycetes;o__Pirellulales;f__Pirellulaceae;g__Mariniblastus;s__	NA	NA	8468922	1	2	1	55	7084	1
2509276001	2509276001	d__Bacteria;p__Planctomycetota;c__Planctomycetes;o__Pirellulales;f__Pirellulaceae;g__Rhodopirellula_B;s__	NA	NA	7266454	NA	1	1	51	5827	1
2509276002	2509276002	d__Bacteria;p__Planctomycetota;c__Planctomycetes;o__Pirellulales;f__Ga0077529;g__Ga0077529;s__	NA	NA	3812820	1	2	1	34	3437	1
2645727791	2645727791	d__Bacteria;p__Proteobacteria;c__Gammaproteobacteria;o__Enterobacterales;f__Alteromonadaceae;g__Pseudoalteromonas;s__Pseudoalteromonas neustonica	NA	NA	4783455	12	4	5	100	4293	67
2645728036	2645728036	d__Bacteria;p__Proteobacteria;c__Gammaproteobacteria;o__Enterobacterales;f__Alteromonadaceae;g__Pseudoalteromonas;s__Pseudoalteromonas neustonica	NA	NA	4820136	12	8	5	103	4330	62
3300005647	3300005647_10	d__Bacteria;p__Bacteroidota;c__Bacteroidia;o__Chitinophagales;f__Saprospiraceae;g__;s__	50.64	3.78	2910742	0	0	0	23	2658	443
3300005647	3300005647_11	d__Bacteria;p__Actinobacteriota;c__Acidimicrobiia;o__Microtrichales;f__UBA10347;g__;s__	61.52	0.85	2360430	0	0	0	16	2409	332
3300005647	3300005647_12	d__Bacteria;p__Bdellovibrionota;c__UBA2394;o__UBA2428;f__UBA2428;g__;s__	76.31	3.91	2288972	0	0	0	32	2521	297
3300005647	3300005647_13	d__Bacteria;p__Planctomycetota;c__Phycisphaerae;o__Phycisphaerales;f__Phycisphaeraceae;g__;s__	64.49	1.14	2230645	0	1	0	42	2212	387
3300005647	3300005647_14	d__Bacteria;p__Verrucomicrobiota;c__Verrucomicrobiae;o__Verrucomicrobiales;f__Akkermansiaceae;g__;s__	80.1	2.41	2003756	0	1	0	27	2184	323
3300005647	3300005647_15	d__Bacteria;p__Bdellovibrionota;c__UBA2394;o__UBA2428;f__;g__;s__	78.87	0	1996837	1	1	2	29	1935	87
3300005647	3300005647_17	d__Bacteria;p__Bacteroidota;c__Bacteroidia;o__Chitinophagales;f__Saprospiraceae;g__;s__	55.93	0.49	1900560	0	0	0	14	1788	380
3300005647	3300005647_18	d__Bacteria;p__Bacteroidota;c__Bacteroidia;o__Chitinophagales;f__Saprospiraceae;g__;s__	54.47	0.99	1777271	0	0	0	12	1799	356
3300005647	3300005647_26	d__Bacteria;p__Patescibacteria;c__Saccharimonadia;o__Saccharimonadales;f__;g__;s__	50.78	2.28	788914	0	1	0	21	962	109
3300005647	3300005647_7	d__Bacteria;p__Verrucomicrobiota;c__Kiritimatiellae;o__SS1-B-03-39;f__;g__;s__	92.74	0.25	5970576	0	0	0	58	5248	394
3300005647	3300005647_9	d__Bacteria;p__Verrucomicrobiota;c__Kiritimatiellae;o__SS1-B-03-39;f__;g__;s__	57.58	1.04	3093042	0	2	1	26	3010	561
3300005651	3300005651_6	d__Bacteria;p__Actinobacteriota;c__Acidimicrobiia;o__Microtrichales;f__UBA10347;g__;s__	50	4.84	2609663	1	0	1	25	2669	453
3300005651	3300005651_7	d__Bacteria;p__Bacteroidota;c__Bacteroidia;o__Chitinophagales;f__Saprospiraceae;g__;s__	68.53	5.4	2559099	1	0	0	26	2475	440
3300009072	3300009072_12	d__Bacteria;p__Patescibacteria;c__Paceibacteria;o__UBA9983_A;f__UBA1006;g__;s__	55.02	0.11	547727	0	1	0	23	621	94
3300009072	3300009072_3	d__Bacteria;p__Cyanobacteria;c__Cyanobacteriia;o__Cyanobacteriales;f__Xenococcaceae;g__Pleurocapsa;s__	98.07	4.69	5786057	1	0	0	35	5352	279
3300009072	3300009072_5	d__Bacteria;p__Proteobacteria;c__Gammaproteobacteria;o__Granulosicoccales;f__Granulosicoccaceae;g__Granulosicoccus;s__	76.38	4.39	4784817	0	0	0	28	4916	683
3300009072	3300009072_6	d__Bacteria;p__Bacteroidota;c__Bacteroidia;o__Flavobacteriales;f__Flavobacteriaceae;g__Wenyingzhuangia;s__	94.13	7.2	4720820	1	0	0	81	4577	679
3300009072	3300009072_9	d__Bacteria;p__Bdellovibrionota_B;c__;o__;f__;g__;s__	81.1	0.84	1705376	1	1	1	27	1769	196
3300009073	3300009073_10	d__Bacteria;p__Chloroflexota;c__Anaerolineae;o__Caldilineales;f__Caldilineaceae;g__;s__	80.64	3.18	6036524	0	0	0	38	5166	716
3300009073	3300009073_12	d__Bacteria;p__Proteobacteria;c__Gammaproteobacteria;o__Granulosicoccales;f__Granulosicoccaceae;g__Granulosicoccus;s__	92.39	5.63	4971208	1	1	1	37	4550	212
3300009073	3300009073_13	d__Bacteria;p__Verrucomicrobiota;c__Kiritimatiellae;o__SS1-B-03-39;f__;g__;s__	84.07	1.72	4877026	2	8	11	43	4152	584
3300009073	3300009073_15	d__Bacteria;p__Planctomycetota;c__Phycisphaerae;o__Phycisphaerales;f__Phycisphaeraceae;g__;s__	96.02	1.14	3883914	1	1	1	58	3242	60
3300009073	3300009073_16	d__Bacteria;p__Proteobacteria;c__Gammaproteobacteria;o__Granulosicoccales;f__Granulosicoccaceae;g__Granulosicoccus;s__	53.75	1.19	3152298	0	0	0	14	3144	474
3300009073	3300009073_17	d__Bacteria;p__Verrucomicrobiota;c__Verrucomicrobiae;o__Verrucomicrobiales;f__Akkermansiaceae;g__;s__	98.64	2.04	2917513	0	1	0	36	2761	75
3300009073	3300009073_19	d__Bacteria;p__Proteobacteria;c__Alphaproteobacteria;o__Caulobacterales;f__Maricaulaceae;g__Hellea;s__	71.35	3.46	2513561	0	0	0	27	2744	453
3300009073	3300009073_21	d__Bacteria;p__Bdellovibrionota;c__Bdellovibrionia;o__Bdellovibrionales;f__UBA1609;g__;s__	61.94	9.62	2136770	0	0	0	24	2116	229
3300009073	3300009073_24	d__Bacteria;p__Bacteroidota;c__Bacteroidia;o__Chitinophagales;f__Saprospiraceae;g__;s__	52.71	1.24	1830890	1	0	1	6	1682	304
3300009073	3300009073_28	d__Bacteria;p__Patescibacteria;c__Paceibacteria_A;o__Moranbacterales;f__GCA-2747515;g__;s__	71.29	1.98	1333191	0	0	0	35	1346	86
3300009073	3300009073_31	d__Bacteria;p__Patescibacteria;c__Saccharimonadia;o__Saccharimonadales;f__;g__;s__	56.52	3.66	953476	0	1	0	32	1109	108
3300009073	3300009073_8	d__Bacteria;p__Proteobacteria;c__Gammaproteobacteria;o__Granulosicoccales;f__Granulosicoccaceae;g__;s__	99.43	9.39	7053850	1	1	1	42	6696	399
3300009073	3300009073_9	d__Bacteria;p__Verrucomicrobiota;c__Kiritimatiellae;o__SS1-B-03-39;f__;g__;s__	95.4	0.03	6401230	0	1	1	53	4973	182
3300009192	3300009192_4	d__Bacteria;p__Bacteroidota;c__Bacteroidia;o__Chitinophagales;f__Saprospiraceae;g__;s__	81.49	0.99	3909227	0	0	0	27	3332	509
3300009410	3300009410_10	d__Bacteria;p__Bacteroidota;c__Bacteroidia;o__Flavobacteriales;f__Flavobacteriaceae;g__Dokdonia;s__	66.9	0.7	2138779	1	0	0	24	2056	225
3300009410	3300009410_11	d__Bacteria;p__Bacteroidota;c__Bacteroidia;o__Flavobacteriales;f__Flavobacteriaceae;g__Olleya;s__Olleya sp000518525	58.75	0.33	1777092	1	0	0	16	1626	16
3300009410	3300009410_15	d__Bacteria;p__Patescibacteria;c__Paceibacteria;o__UBA9983_A;f__UBA1006;g__;s__	57.16	0.85	781521	1	1	1	33	858	73
3300009410	3300009410_4	d__Bacteria;p__Firmicutes_I;c__Bacilli_A;o__Paenibacillales;f__Paenibacillaceae;g__Paenibacillus;s__Paenibacillus amylolyticus_A	99.85	0.1	7043357	6	5	1	63	6532	45
3300009410	3300009410_6	d__Bacteria;p__Proteobacteria;c__Alphaproteobacteria;o__Rhodobacterales;f__Rhodobacteraceae;g__Yoonia;s__	98.18	0.63	3668416	0	0	0	38	3723	28
3300009410	3300009410_7	d__Bacteria;p__Bacteroidota;c__Bacteroidia;o__Chitinophagales;f__Saprospiraceae;g__;s__	76.21	0.52	3314602	0	0	0	23	2918	553
3300009410	3300009410_8	d__Bacteria;p__Firmicutes;c__Bacilli;o__Bacillales_A;f__Planococcaceae;g__Planococcus_B;s__	95.36	0	3274016	6	1	1	35	3405	22
3300009410	3300009410_9	d__Bacteria;p__Proteobacteria;c__Alphaproteobacteria;o__Rhodobacterales;f__Rhodobacteraceae;g__;s__	74.59	1.61	3123009	0	0	0	21	3367	500
3300009415	3300009415_10	d__Bacteria;p__Proteobacteria;c__Gammaproteobacteria;o__Granulosicoccales;f__Granulosicoccaceae;g__Granulosicoccus;s__	93.1	4.9	5253452	2	1	1	31	4962	323
3300009415	3300009415_12	d__Bacteria;p__Bacteroidota;c__Bacteroidia;o__Chitinophagales;f__Saprospiraceae;g__Lewinella_A;s__	97.5	0	5030180	2	0	0	45	4157	146
3300009415	3300009415_13	d__Bacteria;p__Cyanobacteria;c__Cyanobacteriia;o__Thermosynechococcales;f__Thermosynechococcaceae;g__Acaryochloris;s__	97.88	1.38	4711885	1	1	1	40	4378	193
3300009415	3300009415_15	d__Bacteria;p__Bacteroidota;c__Bacteroidia;o__Chitinophagales;f__Saprospiraceae;g__;s__	76.27	1.68	3405020	0	1	1	19	2868	542
3300009415	3300009415_16	d__Bacteria;p__Bacteroidota;c__Bacteroidia;o__Chitinophagales;f__Saprospiraceae;g__;s__	91.83	0.74	3214334	0	0	0	32	2765	195
3300009415	3300009415_17	d__Bacteria;p__Bacteroidota;c__Bacteroidia;o__Chitinophagales;f__Saprospiraceae;g__;s__	67.76	7.23	2880803	1	2	0	14	2780	540
3300009415	3300009415_19	d__Bacteria;p__Proteobacteria;c__Alphaproteobacteria;o__Caulobacterales;f__Maricaulaceae;g__Hellea;s__	85.13	0.41	2473843	1	1	1	35	2453	62
3300009415	3300009415_25	d__Bacteria;p__Patescibacteria;c__Paceibacteria;o__UBA9983_A;f__UBA1006;g__;s__	74.93	0	818390	1	1	1	35	832	14
3300009417	3300009417_12	d__Bacteria;p__Bacteroidota;c__Bacteroidia;o__Chitinophagales;f__Saprospiraceae;g__;s__	74.75	0.74	4310867	1	0	0	20	3278	468
3300009417	3300009417_13	d__Bacteria;p__Verrucomicrobiota;c__Kiritimatiellae;o__SS1-B-03-39;f__;g__;s__	54.31	0.81	3241020	0	0	0	23	2919	567
3300009417	3300009417_14	d__Bacteria;p__Bacteroidota;c__Bacteroidia;o__Chitinophagales;f__Saprospiraceae;g__;s__	70.02	1.01	2846014	0	1	0	18	2426	479
3300009417	3300009417_15	d__Bacteria;p__Proteobacteria;c__Alphaproteobacteria;o__Rhodobacterales;f__Rhodobacteraceae;g__Sulfitobacter;s__	82.2	2.32	2672954	0	0	0	29	2944	400
3300009417	3300009417_16	d__Bacteria;p__Actinobacteriota;c__Acidimicrobiia;o__Microtrichales;f__UBA10347;g__;s__	56.98	1.42	2535542	1	1	1	22	2462	243
3300009417	3300009417_18	d__Bacteria;p__Bdellovibrionota_B;c__;o__;f__;g__;s__	91.43	0	1924539	0	1	0	31	1884	63
3300009417	3300009417_19	d__Bacteria;p__Proteobacteria;c__Alphaproteobacteria;o__Rhodobacterales;f__Rhodobacteraceae;g__Planktomarina;s__	60.32	0.36	1623616	0	0	0	11	1868	291
3300009421	3300009421_11	d__Bacteria;p__Planctomycetota;c__Phycisphaerae;o__Phycisphaerales;f__Phycisphaeraceae;g__;s__	96.59	1.14	3974378	1	1	1	64	3311	70
3300009421	3300009421_12	d__Bacteria;p__Bacteroidota;c__Bacteroidia;o__Chitinophagales;f__Saprospiraceae;g__;s__	85.08	2.72	3552062	0	1	0	27	2971	419
3300009421	3300009421_13	d__Bacteria;p__Proteobacteria;c__Alphaproteobacteria;o__Rhodobacterales;f__Rhodobacteraceae;g__;s__	85.44	5.29	3537610	2	0	0	28	3874	494
3300009421	3300009421_14	d__Bacteria;p__Deinococcota;c__Deinococci;o__Deinococcales;f__Trueperaceae;g__;s__	62.18	2.14	3315264	1	1	1	34	3705	600
3300009421	3300009421_15	d__Bacteria;p__Proteobacteria;c__Alphaproteobacteria;o__Rhodobacterales;f__Rhodobacteraceae;g__UBA3435;s__	85.09	1.64	2756283	0	0	0	30	3146	309
3300009421	3300009421_19	d__Bacteria;p__Proteobacteria;c__Alphaproteobacteria;o__Sphingomonadales;f__Sphingomonadaceae;g__Ga0077559;s__	84.96	1.84	2052725	1	1	1	35	2245	244
3300009421	3300009421_20	d__Bacteria;p__Bacteroidota;c__Bacteroidia;o__Chitinophagales;f__;g__;s__	70.57	1.28	2006829	1	1	1	19	1966	220
3300009421	3300009421_29	d__Bacteria;p__Patescibacteria;c__Paceibacteria;o__UBA9983_A;f__UBA1006;g__;s__	74.93	0	818496	1	1	1	35	831	15
3300009421	3300009421_6	d__Bacteria;p__Proteobacteria;c__Gammaproteobacteria;o__Granulosicoccales;f__Granulosicoccaceae;g__Granulosicoccus;s__	94.32	6.79	5779333	3	0	0	35	5341	165
3300009421	3300009421_7	d__Bacteria;p__Proteobacteria;c__Gammaproteobacteria;o__Granulosicoccales;f__Granulosicoccaceae;g__;s__	87.09	8.1	5026212	0	0	0	37	5010	605
3300009421	3300009421_8	d__Bacteria;p__Cyanobacteria;c__Cyanobacteriia;o__Thermosynechococcales;f__Thermosynechococcaceae;g__Acaryochloris;s__	99.76	1.06	4846472	1	1	2	42	4386	91
3300009421	3300009421_9	d__Bacteria;p__Bacteroidota;c__Bacteroidia;o__Chitinophagales;f__Saprospiraceae;g__Lewinella_A;s__	97	0.5	4804069	2	0	0	43	3931	138
3300009439	3300009439_10	d__Bacteria;p__Chloroflexota;c__Anaerolineae;o__Caldilineales;f__Caldilineaceae;g__;s__	89.02	8.64	6369140	2	0	0	32	5564	667
3300009439	3300009439_13	d__Bacteria;p__Proteobacteria;c__Gammaproteobacteria;o__Granulosicoccales;f__Granulosicoccaceae;g__;s__	83.58	6.71	5345202	0	0	0	32	4981	286
3300009439	3300009439_14	d__Bacteria;p__Bacteroidota;c__Bacteroidia;o__Chitinophagales;f__Saprospiraceae;g__;s__	62.98	1.73	3834477	1	0	0	21	3242	664
3300009439	3300009439_15	d__Bacteria;p__Verrucomicrobiota;c__Verrucomicrobiae;o__Verrucomicrobiales;f__DEV007;g__;s__	86.42	1.02	3678585	1	0	1	29	3494	522
3300009439	3300009439_16	d__Bacteria;p__Bacteroidota;c__Bacteroidia;o__Chitinophagales;f__Saprospiraceae;g__Lewinella_A;s__	57.46	1.5	3460942	0	0	0	22	3190	518
3300009439	3300009439_17	d__Bacteria;p__Proteobacteria;c__Alphaproteobacteria;o__Caulobacterales;f__Maricaulaceae;g__Hellea;s__	82.56	3.57	3205696	0	1	0	40	3346	436
3300009439	3300009439_18	d__Bacteria;p__Actinobacteriota;c__Acidimicrobiia;o__Microtrichales;f__UBA10347;g__;s__	65.38	5.73	2907166	1	1	1	28	2815	345
3300009439	3300009439_20	d__Bacteria;p__Bacteroidota;c__Bacteroidia;o__Chitinophagales;f__Saprospiraceae;g__;s__	55.98	1.16	2015638	0	0	0	14	1912	364
3300009439	3300009439_26	d__Bacteria;p__Actinobacteriota;c__Acidimicrobiia;o__Microtrichales;f__SZUA-35;g__;s__	51.71	0	1071170	1	1	1	14	1212	177
3300009446	3300009446_10	d__Bacteria;p__Bacteroidota;c__Bacteroidia;o__Chitinophagales;f__;g__;s__	81.53	5.5	4770081	1	0	0	31	4280	702
3300009446	3300009446_11	d__Bacteria;p__Verrucomicrobiota;c__Kiritimatiellae;o__SS1-B-03-39;f__;g__;s__	76.24	0.73	4397173	1	1	1	28	3967	646
3300009446	3300009446_12	d__Bacteria;p__Bacteroidota;c__Bacteroidia;o__Chitinophagales;f__Saprospiraceae;g__;s__	87.3	0.74	4270077	1	0	1	39	3808	488
3300009446	3300009446_14	d__Bacteria;p__Bacteroidota;c__Bacteroidia;o__Chitinophagales;f__Saprospiraceae;g__;s__	62.94	1.98	3273430	1	0	1	5	2858	616
3300009446	3300009446_15	d__Bacteria;p__Actinobacteriota;c__Acidimicrobiia;o__Microtrichales;f__UBA10347;g__;s__	61.59	2.14	2751388	0	0	0	20	2647	388
3300009446	3300009446_17	d__Bacteria;p__Bacteroidota;c__Bacteroidia;o__Chitinophagales;f__Saprospiraceae;g__;s__	53.47	0.74	2527769	0	0	0	14	2010	367
3300009446	3300009446_18	d__Bacteria;p__Actinobacteriota;c__Acidimicrobiia;o__Microtrichales;f__SZUA-35;g__;s__	85.47	0.43	2370221	2	1	1	34	2591	253
3300026840	3300026840_1	d__Bacteria;p__Firmicutes;c__Bacilli;o__Bacillales;f__Bacillaceae_G;g__Bacillus_A;s__Bacillus_A toyonensis	86.35	2.54	5286085	6	3	0	33	5884	630
3300026840	3300026840_2	d__Bacteria;p__Bacteroidota;c__Bacteroidia;o__Chitinophagales;f__Saprospiraceae;g__;s__	89.85	2.97	5685861	1	0	0	33	4674	589
3300026840	3300026840_3	d__Bacteria;p__Bacteroidota;c__Bacteroidia;o__Chitinophagales;f__Saprospiraceae;g__;s__	79.77	3.42	4761835	1	0	0	23	4332	622
3300026840	3300026840_5	d__Bacteria;p__Bacteroidota;c__Bacteroidia;o__Flavobacteriales;f__Flavobacteriaceae;g__Aquimarina;s__	98	0.97	3677101	2	2	0	61	3690	189
3300026840	3300026840_6	d__Bacteria;p__Proteobacteria;c__Gammaproteobacteria;o__Pseudomonadales;f__Halomonadaceae;g__Cobetia;s__Cobetia amphilecti	77.59	0	2868955	5	0	0	57	2417	8
3300026840	3300026840_7	d__Bacteria;p__Proteobacteria;c__Gammaproteobacteria;o__Pseudomonadales;f__Halomonadaceae;g__Halomonas;s__	58.43	0.05	2811157	0	0	0	29	2911	449
3300026840	3300026840_8	d__Bacteria;p__Proteobacteria;c__Gammaproteobacteria;o__Enterobacterales;f__Alteromonadaceae;g__Pseudoalteromonas;s__Pseudoalteromonas distincta	65.54	0.34	2557576	8	5	0	52	2360	13
3300027009	3300027009_5	d__Bacteria;p__Cyanobacteria;c__Cyanobacteriia;o__Cyanobacteriales;f__Xenococcaceae;g__Pleurocapsa;s__	90.87	0.9	5297254	2	1	1	31	4809	101
3300027009	3300027009_6	d__Bacteria;p__Bacteroidota;c__Bacteroidia;o__Chitinophagales;f__Saprospiraceae;g__;s__	87.43	0.42	4054284	1	1	1	30	3483	481
3300027009	3300027009_7	d__Bacteria;p__Bacteroidota;c__Bacteroidia;o__Chitinophagales;f__;g__;s__	55.67	0.18	2893223	0	1	0	44	2687	210
3300027009	3300027009_8	d__Bacteria;p__Bacteroidota;c__Bacteroidia;o__Flavobacteriales;f__Flavobacteriaceae;g__Wenyingzhuangia;s__	94.19	0.68	2378420	3	1	1	46	2226	109
3300027028	3300027028_10	d__Bacteria;p__Firmicutes;c__Bacilli;o__Bacillales;f__Bacillaceae_B;g__Bacillus_F;s__	51.72	0	2910611	8	8	4	93	2989	14
3300027028	3300027028_11	d__Bacteria;p__Bacteroidota;c__Bacteroidia;o__Flavobacteriales;f__Flavobacteriaceae;g__Dokdonia;s__	66.55	5.8	2494010	1	0	0	25	2553	383
3300027028	3300027028_14	d__Bacteria;p__Firmicutes;c__Bacilli;o__Staphylococcales;f__Staphylococcaceae;g__Staphylococcus;s__Staphylococcus warneri	98.83	0.08	2333093	6	4	0	52	2360	46
3300027028	3300027028_16	d__Bacteria;p__Firmicutes;c__Bacilli;o__Bacillales;f__Bacillaceae_H;g__Bacillus_C;s__Bacillus_C aryabhattai	54.8	1.07	2208848	2	3	0	13	2674	463
3300027028	3300027028_18	d__Bacteria;p__Firmicutes;c__Bacilli;o__Bacillales;f__Bacillaceae;g__Bacillus;s__Bacillus pumilus	53.45	0	1739886	0	1	0	8	1858	21
3300027028	3300027028_2	d__Bacteria;p__Firmicutes_I;c__Bacilli_A;o__Paenibacillales;f__Paenibacillaceae;g__Paenibacillus;s__Paenibacillus amylolyticus_A	99.85	0.1	7193753	6	9	6	74	6744	22
3300027028	3300027028_6	d__Bacteria;p__Proteobacteria;c__Alphaproteobacteria;o__Rhodobacterales;f__Rhodobacteraceae;g__Yoonia;s__	98.78	1.09	3731022	0	0	0	40	3868	87
3300027028	3300027028_7	d__Bacteria;p__Firmicutes;c__Bacilli;o__Bacillales_A;f__Planococcaceae;g__Planococcus_B;s__	99.34	0	3548201	6	5	3	45	3740	18
3300027028	3300027028_8	d__Bacteria;p__Bacteroidota;c__Bacteroidia;o__Flavobacteriales;f__Flavobacteriaceae;g__Olleya;s__Olleya sp000518525	99.67	0.33	3512916	2	0	0	34	3211	25
3300027028	3300027028_9	d__Bacteria;p__Firmicutes;c__Bacilli;o__Bacillales;f__Bacillaceae;g__Bacillus;s__Bacillus altitudinis	81.38	0	3414192	3	5	0	35	3584	28
3300027262	3300027262_10	d__Bacteria;p__Cyanobacteria;c__Cyanobacteriia;o__Thermosynechococcales;f__Thermosynechococcaceae;g__Acaryochloris;s__	92.92	1.62	4478136	0	1	0	36	4373	435
3300027262	3300027262_11	d__Bacteria;p__Actinobacteriota;c__Acidimicrobiia;o__Microtrichales;f__Ilumatobacteraceae;g__Ilumatobacter;s__	99.15	2.14	3958713	1	1	1	45	3694	62
3300027262	3300027262_12	d__Bacteria;p__Proteobacteria;c__Gammaproteobacteria;o__Granulosicoccales;f__Granulosicoccaceae;g__Granulosicoccus;s__	62.69	1.64	3529411	0	1	0	12	3637	607
3300027262	3300027262_13	d__Bacteria;p__Proteobacteria;c__Gammaproteobacteria;o__Enterobacterales;f__Alteromonadaceae;g__Colwellia;s__	92.78	0.48	3404502	3	0	0	60	2959	225
3300027262	3300027262_14	d__Bacteria;p__Bacteroidota;c__Bacteroidia;o__Chitinophagales;f__Saprospiraceae;g__;s__	70.9	0.5	3382321	1	1	1	29	3023	552
3300027262	3300027262_15	d__Bacteria;p__Bacteroidota;c__Bacteroidia;o__Chitinophagales;f__Saprospiraceae;g__;s__	56.27	0.5	3323686	1	0	0	12	2740	154
3300027262	3300027262_17	d__Bacteria;p__Proteobacteria;c__Alphaproteobacteria;o__Caulobacterales;f__Maricaulaceae;g__Hellea;s__	92.94	4.32	2848831	1	1	1	39	2976	231
3300027262	3300027262_18	d__Bacteria;p__Bacteroidota;c__Bacteroidia;o__Chitinophagales;f__Saprospiraceae;g__;s__	60.89	0.03	2819982	0	1	0	19	2678	462
3300027262	3300027262_19	d__Bacteria;p__Bacteroidota;c__Bacteroidia;o__Chitinophagales;f__Saprospiraceae;g__;s__	80.91	1.49	2831562	0	0	0	28	2529	269
3300027262	3300027262_21	d__Bacteria;p__Proteobacteria;c__Alphaproteobacteria;o__Sphingomonadales;f__Sphingomonadaceae;g__Erythrobacter_B;s__	60.13	2.17	1857551	1	0	1	26	2082	327
3300027262	3300027262_4	d__Bacteria;p__Chloroflexota;c__Anaerolineae;o__Caldilineales;f__Caldilineaceae;g__;s__	98.18	5.18	6912155	1	1	1	43	5835	588
3300027262	3300027262_5	d__Bacteria;p__Cyanobacteria;c__Cyanobacteriia;o__Cyanobacteriales;f__Xenococcaceae;g__Pleurocapsa;s__	99.27	0.98	5595917	3	0	0	34	5020	74
3300027262	3300027262_6	d__Bacteria;p__Proteobacteria;c__Gammaproteobacteria;o__Granulosicoccales;f__Granulosicoccaceae;g__;s__	88.25	5.64	5179980	1	1	1	34	5130	456
3300027262	3300027262_7	d__Bacteria;p__Proteobacteria;c__Gammaproteobacteria;o__Granulosicoccales;f__Granulosicoccaceae;g__;s__	93.04	4.1	5172014	1	1	1	36	4704	76
3300027262	3300027262_8	d__Bacteria;p__Bacteroidota;c__Bacteroidia;o__Chitinophagales;f__Saprospiraceae;g__Lewinella_A;s__	97.8	1.64	5076189	2	1	0	43	4294	273
3300027325	3300027325_11	d__Bacteria;p__Verrucomicrobiota;c__Verrucomicrobiae;o__Verrucomicrobiales;f__DEV007;g__;s__	80.34	3.29	4608362	0	0	0	44	4436	710
3300027325	3300027325_12	d__Bacteria;p__Verrucomicrobiota;c__Verrucomicrobiae;o__Verrucomicrobiales;f__;g__;s__	99.77	1.25	4528234	1	0	0	48	4292	163
3300027325	3300027325_13	d__Bacteria;p__Bacteroidota;c__Bacteroidia;o__Chitinophagales;f__;g__;s__	94.79	0.74	4234833	0	0	0	32	3712	299
3300027325	3300027325_14	d__Bacteria;p__Bacteroidota;c__Bacteroidia;o__Chitinophagales;f__Saprospiraceae;g__;s__	74.57	1.49	4177865	1	0	0	23	3456	562
3300027325	3300027325_15	d__Bacteria;p__Proteobacteria;c__Gammaproteobacteria;o__Granulosicoccales;f__Granulosicoccaceae;g__Granulosicoccus;s__	71.01	1.93	3367250	1	0	1	25	3292	261
3300027325	3300027325_17	d__Bacteria;p__Bacteroidota;c__Bacteroidia;o__Chitinophagales;f__Saprospiraceae;g__;s__	64.32	2.99	3043868	1	0	0	20	2677	510
3300027325	3300027325_19	d__Bacteria;p__Bacteroidota;c__Bacteroidia;o__Chitinophagales;f__Saprospiraceae;g__;s__	50.9	2.01	2826475	1	0	0	22	2519	535
3300027325	3300027325_20	d__Bacteria;p__Bacteroidota;c__Bacteroidia;o__Chitinophagales;f__Saprospiraceae;g__;s__	63.46	0.52	2523628	1	0	1	20	2262	450
3300027325	3300027325_22	d__Bacteria;p__Actinobacteriota;c__Acidimicrobiia;o__Microtrichales;f__UBA10347;g__;s__	55.3	1.71	2245241	0	0	0	20	2378	415
3300027325	3300027325_24	d__Bacteria;p__Bdellovibrionota_B;c__UBA2361;o__UBA2361;f__;g__;s__	89.08	1.26	2247227	1	1	1	36	2299	124
3300027325	3300027325_25	d__Bacteria;p__Bdellovibrionota_B;c__;o__;f__;g__;s__	90.59	0	1958064	1	1	1	33	1928	59
3300027325	3300027325_4	d__Bacteria;p__Bacteroidota;c__Bacteroidia;o__Chitinophagales;f__Saprospiraceae;g__;s__	99.01	2	7355718	1	1	1	66	5820	256
3300027325	3300027325_6	d__Bacteria;p__Proteobacteria;c__Gammaproteobacteria;o__Granulosicoccales;f__Granulosicoccaceae;g__Granulosicoccus;s__	90.65	6.95	5554077	1	1	0	36	5388	390
3300027325	3300027325_7	d__Bacteria;p__Verrucomicrobiota;c__Kiritimatiellae;o__SS1-B-03-39;f__;g__;s__	82.6	0.34	5408104	1	1	1	51	4592	452
3300027325	3300027325_8	d__Bacteria;p__Bacteroidota;c__Bacteroidia;o__Chitinophagales;f__Saprospiraceae;g__;s__	76.16	3	5290640	1	0	0	43	4815	666
3300027325	3300027325_9	d__Bacteria;p__Proteobacteria;c__Gammaproteobacteria;o__Granulosicoccales;f__Granulosicoccaceae;g__;s__	89.96	5.93	4947898	1	1	0	30	4682	310
3300027498	3300027498_10	d__Bacteria;p__Cyanobacteria;c__Cyanobacteriia;o__Thermosynechococcales;f__Thermosynechococcaceae;g__Acaryochloris;s__	99.76	0.83	4784222	1	1	1	42	4326	60
3300027498	3300027498_11	d__Bacteria;p__Bacteroidota;c__Bacteroidia;o__Chitinophagales;f__;g__;s__	84.98	0.99	4601829	2	0	0	40	3845	356
3300027498	3300027498_12	d__Bacteria;p__Bacteroidota;c__Bacteroidia;o__Chitinophagales;f__Saprospiraceae;g__;s__	94.7	1.61	4478936	1	1	1	32	3729	273
3300027498	3300027498_13	d__Bacteria;p__Bacteroidota;c__Bacteroidia;o__Chitinophagales;f__Saprospiraceae;g__;s__	95.54	0	4312883	1	1	1	28	3572	63
3300027498	3300027498_14	d__Bacteria;p__Actinobacteriota;c__Acidimicrobiia;o__Microtrichales;f__Ilumatobacteraceae;g__Ilumatobacter;s__	99.15	1.28	4174874	1	2	1	45	3976	33
3300027498	3300027498_16	d__Bacteria;p__Planctomycetota;c__Phycisphaerae;o__Phycisphaerales;f__Phycisphaeraceae;g__;s__	96.59	1.14	3976806	1	1	1	64	3285	25
3300027498	3300027498_17	d__Bacteria;p__Bacteroidota;c__Bacteroidia;o__Chitinophagales;f__Saprospiraceae;g__;s__	56.44	0.99	3897811	0	0	0	27	3053	164
3300027498	3300027498_18	d__Bacteria;p__Bacteroidota;c__Bacteroidia;o__Chitinophagales;f__Saprospiraceae;g__;s__	93.07	0.5	3830942	0	1	1	31	3123	243
3300027498	3300027498_19	d__Bacteria;p__Proteobacteria;c__Gammaproteobacteria;o__Enterobacterales;f__Alteromonadaceae;g__Colwellia;s__	96.63	1.9	3540244	3	0	0	60	3048	76
3300027498	3300027498_20	d__Bacteria;p__Bacteroidota;c__Bacteroidia;o__Flavobacteriales;f__Flavobacteriaceae;g__Aquimarina;s__	95.34	0.19	3518021	2	2	1	36	3468	154
3300027498	3300027498_21	d__Bacteria;p__Bacteroidota;c__Bacteroidia;o__Flavobacteriales;f__Flavobacteriaceae;g__SZUA-72;s__	73.27	0.17	3392090	1	1	1	45	3000	8
3300027498	3300027498_22	d__Bacteria;p__Proteobacteria;c__Alphaproteobacteria;o__Caulobacterales;f__Maricaulaceae;g__Hellea;s__	88.93	4.11	3335044	0	1	1	33	3363	320
3300027498	3300027498_23	d__Bacteria;p__Bacteroidota;c__Bacteroidia;o__Chitinophagales;f__Saprospiraceae;g__;s__	67.24	6.9	3324337	1	1	1	26	2814	169
3300027498	3300027498_24	d__Bacteria;p__Bacteroidota;c__Bacteroidia;o__Chitinophagales;f__Chitinophagaceae;g__;s__	98.52	1.58	3208230	1	1	1	34	2949	52
3300027498	3300027498_25	d__Bacteria;p__Proteobacteria;c__Alphaproteobacteria;o__Caulobacterales;f__Maricaulaceae;g__Hellea;s__	97.01	8.77	3149313	1	1	1	37	3127	96
3300027498	3300027498_26	d__Bacteria;p__Bacteroidota;c__Bacteroidia;o__Chitinophagales;f__Saprospiraceae;g__;s__	68.16	1.27	2964629	0	0	0	16	2679	492
3300027498	3300027498_28	d__Bacteria;p__Bacteroidota;c__Bacteroidia;o__Chitinophagales;f__Saprospiraceae;g__;s__	59.69	3.16	2383053	0	0	0	19	2091	448
3300027498	3300027498_29	d__Bacteria;p__Proteobacteria;c__Gammaproteobacteria;o__Granulosicoccales;f__Granulosicoccaceae;g__;s__	58.62	0	2291528	0	0	0	20	2399	449
3300027498	3300027498_3	d__Bacteria;p__Chloroflexota;c__Anaerolineae;o__Caldilineales;f__Caldilineaceae;g__;s__	92.73	3.18	6273647	2	0	0	34	5186	379
3300027498	3300027498_36	d__Bacteria;p__Patescibacteria;c__Paceibacteria;o__UBA9983_A;f__UBA1006;g__;s__	74.93	0	839475	1	1	1	35	838	7
3300027498	3300027498_4	d__Bacteria;p__Proteobacteria;c__Gammaproteobacteria;o__Granulosicoccales;f__Granulosicoccaceae;g__Granulosicoccus;s__	94.32	5.23	5800664	2	0	0	33	5410	68
3300027498	3300027498_6	d__Bacteria;p__Proteobacteria;c__Gammaproteobacteria;o__Granulosicoccales;f__Granulosicoccaceae;g__Granulosicoccus;s__	89.14	4.75	5567549	1	1	1	35	5268	204
3300027498	3300027498_8	d__Bacteria;p__Bacteroidota;c__Bacteroidia;o__Chitinophagales;f__Saprospiraceae;g__Lewinella_A;s__	98.95	2	5136456	2	1	0	56	4208	103
3300027509	3300027509_11	d__Bacteria;p__Bacteroidota;c__Bacteroidia;o__Chitinophagales;f__Saprospiraceae;g__;s__	94.31	5.69	5861932	2	0	0	37	4910	202
3300027509	3300027509_12	d__Bacteria;p__Proteobacteria;c__Gammaproteobacteria;o__Granulosicoccales;f__Granulosicoccaceae;g__;s__	92.03	5.94	5505751	1	1	1	37	4966	73
3300027509	3300027509_13	d__Bacteria;p__Bacteroidota;c__Bacteroidia;o__Chitinophagales;f__Saprospiraceae;g__;s__	82.04	5.97	5329177	1	0	0	30	4674	723
3300027509	3300027509_14	d__Bacteria;p__Actinobacteriota;c__Acidimicrobiia;o__Microtrichales;f__UBA10347;g__UBA10347;s__	98.29	3.16	5272117	1	1	1	49	4975	64
3300027509	3300027509_15	d__Bacteria;p__Proteobacteria;c__Gammaproteobacteria;o__Granulosicoccales;f__Granulosicoccaceae;g__Granulosicoccus;s__	91.45	4.58	5013953	1	0	1	38	4602	228
3300027509	3300027509_16	d__Bacteria;p__Bacteroidota;c__Bacteroidia;o__Chitinophagales;f__Saprospiraceae;g__;s__	90.22	4.21	4801940	2	1	0	37	4009	352
3300027509	3300027509_17	d__Bacteria;p__Bacteroidota;c__Bacteroidia;o__Chitinophagales;f__;g__;s__	70.89	0	4549230	1	1	1	31	3705	86
3300027509	3300027509_18	d__Bacteria;p__Bacteroidota;c__Bacteroidia;o__Chitinophagales;f__Saprospiraceae;g__;s__	94.55	0	4304159	1	1	1	30	3516	107
3300027509	3300027509_19	d__Bacteria;p__Actinobacteriota;c__Acidimicrobiia;o__Microtrichales;f__UBA10347;g__;s__	96.15	1.28	4218441	0	1	0	45	3899	87
3300027509	3300027509_20	d__Bacteria;p__Bacteroidota;c__Bacteroidia;o__Chitinophagales;f__Saprospiraceae;g__;s__	97.76	0.5	4227910	1	1	1	30	3353	95
3300027509	3300027509_21	d__Bacteria;p__Bacteroidota;c__Bacteroidia;o__Chitinophagales;f__Saprospiraceae;g__;s__	84.16	0.74	3982096	2	0	0	28	3116	82
3300027509	3300027509_22	d__Bacteria;p__Verrucomicrobiota;c__Kiritimatiellae;o__SS1-B-03-39;f__;g__;s__	73.82	1.38	3962261	1	1	1	32	3239	105
3300027509	3300027509_23	d__Bacteria;p__Planctomycetota;c__Phycisphaerae;o__Phycisphaerales;f__Phycisphaeraceae;g__;s__	96.02	1.14	3919860	1	1	1	59	3280	46
3300027509	3300027509_24	d__Bacteria;p__Bacteroidota;c__Bacteroidia;o__Chitinophagales;f__;g__;s__	98.03	0.49	3540582	1	0	1	38	3269	16
3300027509	3300027509_25	d__Bacteria;p__Bacteroidota;c__Bacteroidia;o__Chitinophagales;f__Saprospiraceae;g__;s__	77.72	0	3492788	1	0	1	23	2842	59
3300027509	3300027509_26	d__Bacteria;p__Bacteroidota;c__Bacteroidia;o__Chitinophagales;f__Chitinophagaceae;g__;s__	99.01	0.74	3425332	1	1	1	40	3058	33
3300027509	3300027509_27	d__Bacteria;p__Bdellovibrionota;c__Bdellovibrionia;o__Bdellovibrionales;f__UBA1609;g__;s__	96.43	1.34	3318167	0	0	0	28	3362	277
3300027509	3300027509_28	d__Bacteria;p__Verrucomicrobiota;c__Verrucomicrobiae;o__Verrucomicrobiales;f__Akkermansiaceae;g__;s__	97.96	1.36	2978956	1	1	1	37	2856	130
3300027509	3300027509_29	d__Bacteria;p__Proteobacteria;c__Alphaproteobacteria;o__Caulobacterales;f__Maricaulaceae;g__Hellea;s__	81.45	3.13	2934437	0	0	0	37	3181	408
3300027509	3300027509_30	d__Bacteria;p__Verrucomicrobiota;c__Verrucomicrobiae;o__Verrucomicrobiales;f__;g__;s__	58.82	0	2571374	0	0	0	23	2549	350
3300027509	3300027509_31	d__Bacteria;p__Bacteroidota;c__Bacteroidia;o__Chitinophagales;f__Chitinophagaceae;g__;s__	83.02	0.92	2546805	0	1	0	22	2512	267
3300027509	3300027509_32	d__Bacteria;p__Bdellovibrionota;c__UBA2394;o__UBA2428;f__UBA2428;g__;s__	89.81	0	2482065	1	1	2	34	2441	31
3300027509	3300027509_33	d__Bacteria;p__Bdellovibrionota;c__UBA2394;o__UBA2428;f__;g__;s__	89.81	0	2403613	1	1	1	36	2243	19
3300027509	3300027509_35	d__Bacteria;p__Bacteroidota;c__Bacteroidia;o__Chitinophagales;f__Saprospiraceae;g__;s__	53.45	0	2132130	0	1	1	10	1742	11
3300027509	3300027509_36	d__Bacteria;p__Bdellovibrionota;c__UBA2394;o__UBA2428;f__UBA2428;g__;s__	91.44	0	2113796	1	1	1	31	1953	16
3300027509	3300027509_37	d__Bacteria;p__Proteobacteria;c__Alphaproteobacteria;o__Caulobacterales;f__Maricaulaceae;g__Hellea;s__	57.21	2.59	2003493	1	1	2	24	1991	103
3300027509	3300027509_39	d__Bacteria;p__Bdellovibrionota;c__Bacteriovoracia;o__Bacteriovoracales;f__Bacteriovoracaceae;g__;s__	69.64	2.23	1827823	1	0	0	22	2086	293
3300027509	3300027509_43	d__Bacteria;p__Patescibacteria;c__Paceibacteria_A;o__Moranbacterales;f__GCA-2747515;g__;s__	71.29	0.99	1422174	0	0	0	37	1434	39
3300027509	3300027509_48	d__Bacteria;p__Patescibacteria;c__Saccharimonadia;o__Saccharimonadales;f__;g__;s__	70.06	2.29	967163	1	1	1	39	1057	51
3300027509	3300027509_6	d__Bacteria;p__Chloroflexota;c__Anaerolineae;o__Caldilineales;f__Caldilineaceae;g__;s__	89.09	4.27	6664738	1	1	1	48	5862	564
3300027509	3300027509_7	d__Bacteria;p__Verrucomicrobiota;c__Kiritimatiellae;o__SS1-B-03-39;f__;g__;s__	96.11	0.25	6632095	1	1	1	53	5053	63
3300027509	3300027509_8	d__Bacteria;p__Proteobacteria;c__Gammaproteobacteria;o__Granulosicoccales;f__Granulosicoccaceae;g__Granulosicoccus;s__	90.12	6.96	6090682	0	1	0	35	5890	377
3300027554	3300027554_10	d__Bacteria;p__Planctomycetota;c__Planctomycetes;o__Pirellulales;f__Pirellulaceae;g__Mariniblastus;s__	83.86	8.24	5336440	1	0	1	55	4676	615
3300027554	3300027554_11	d__Bacteria;p__Bacteroidota;c__Bacteroidia;o__Chitinophagales;f__Saprospiraceae;g__;s__	85.65	1.98	5317558	0	0	0	31	4547	679
3300027554	3300027554_14	d__Bacteria;p__Bacteroidota;c__Bacteroidia;o__Chitinophagales;f__;g__;s__	90.97	3.3	5207010	0	0	0	28	4453	284
3300027554	3300027554_15	d__Bacteria;p__Actinobacteriota;c__Acidimicrobiia;o__Microtrichales;f__UBA10347;g__UBA10347;s__	98.1	8.97	4834825	2	2	2	49	4762	308
3300027554	3300027554_16	d__Bacteria;p__Proteobacteria;c__Gammaproteobacteria;o__Granulosicoccales;f__Granulosicoccaceae;g__Granulosicoccus;s__	92.57	3.98	4878010	1	1	1	37	4388	164
3300027554	3300027554_17	d__Bacteria;p__Bacteroidota;c__Bacteroidia;o__Chitinophagales;f__Saprospiraceae;g__;s__	87.25	1.98	4768386	0	0	0	28	3791	334
3300027554	3300027554_18	d__Bacteria;p__Actinobacteriota;c__Acidimicrobiia;o__Microtrichales;f__UBA10347;g__;s__	94.87	2.99	4421589	3	3	3	47	4139	157
3300027554	3300027554_19	d__Bacteria;p__Chloroflexota;c__Anaerolineae;o__Caldilineales;f__Caldilineaceae;g__;s__	57.73	2.27	4255536	0	0	0	21	3818	644
3300027554	3300027554_20	d__Bacteria;p__Actinobacteriota;c__Acidimicrobiia;o__Microtrichales;f__UBA10347;g__;s__	95.3	6.7	3981822	0	1	0	44	3801	213
3300027554	3300027554_21	d__Bacteria;p__Actinobacteriota;c__Acidimicrobiia;o__Microtrichales;f__UBA10347;g__UBA10347;s__	91.74	2.99	3924253	0	0	0	35	3875	211
3300027554	3300027554_22	d__Bacteria;p__Bacteroidota;c__Bacteroidia;o__Chitinophagales;f__Saprospiraceae;g__;s__	85.89	2.64	3825352	2	0	1	27	3032	177
3300027554	3300027554_23	d__Bacteria;p__Proteobacteria;c__Alphaproteobacteria;o__Caulobacterales;f__Maricaulaceae;g__Hellea;s__	97.02	6.39	3797858	1	2	3	41	3851	292
3300027554	3300027554_24	d__Bacteria;p__Actinobacteriota;c__Acidimicrobiia;o__Microtrichales;f__Ilumatobacteraceae;g__Ilumatobacter;s__	91.03	2.85	3468103	0	0	0	41	3500	360
3300027554	3300027554_25	d__Bacteria;p__Bacteroidota;c__Bacteroidia;o__Chitinophagales;f__Saprospiraceae;g__;s__	65.84	0	3146169	0	0	0	20	2603	297
3300027554	3300027554_29	d__Bacteria;p__Bacteroidota;c__Bacteroidia;o__Chitinophagales;f__Saprospiraceae;g__;s__	52.2	0	2204619	0	0	0	6	1857	351
3300027554	3300027554_30	d__Bacteria;p__Bacteroidota;c__Bacteroidia;o__Chitinophagales;f__;g__;s__	56.57	1.48	2200211	2	2	2	21	2026	140
3300027554	3300027554_6	d__Bacteria;p__Proteobacteria;c__Gammaproteobacteria;o__Granulosicoccales;f__Granulosicoccaceae;g__;s__	89.97	7.5	6240776	1	0	1	34	5851	277
3300027554	3300027554_9	d__Bacteria;p__Cyanobacteria;c__Cyanobacteriia;o__Cyanobacteriales;f__Xenococcaceae;g__Pleurocapsa;s__	99.13	0.95	5378965	3	1	0	33	5036	140
3300027623	3300027623_11	d__Bacteria;p__Bacteroidota;c__Bacteroidia;o__Chitinophagales;f__Saprospiraceae;g__;s__	95.05	2.23	4815079	0	0	0	31	3902	382
3300027623	3300027623_12	d__Bacteria;p__Proteobacteria;c__Gammaproteobacteria;o__Granulosicoccales;f__Granulosicoccaceae;g__Granulosicoccus;s__	84.61	6.06	4773231	1	1	1	27	4596	485
3300027623	3300027623_15	d__Bacteria;p__Actinobacteriota;c__Acidimicrobiia;o__Microtrichales;f__UBA10347;g__;s__	93.16	1.38	3937888	0	0	0	41	3739	180
3300027623	3300027623_16	d__Bacteria;p__Proteobacteria;c__Gammaproteobacteria;o__Thiotrichales;f__Thiotrichaceae;g__Leucothrix;s__	91.08	5.07	4087292	2	1	0	43	4162	401
3300027623	3300027623_17	d__Bacteria;p__Bacteroidota;c__Bacteroidia;o__Chitinophagales;f__;g__;s__	73.73	5.2	3872061	1	0	1	27	3592	655
3300027623	3300027623_18	d__Bacteria;p__Bacteroidota;c__Bacteroidia;o__Chitinophagales;f__;g__;s__	91.46	0.99	3828078	0	1	0	26	3448	270
3300027623	3300027623_19	d__Bacteria;p__Proteobacteria;c__Gammaproteobacteria;o__Granulosicoccales;f__Granulosicoccaceae;g__;s__	55.79	4.04	3656418	0	0	0	25	3703	564
3300027623	3300027623_21	d__Bacteria;p__Planctomycetota;c__Planctomycetes;o__Pirellulales;f__Pirellulaceae;g__Mariniblastus;s__	52.33	8.41	3313432	0	0	0	26	3138	677
3300027623	3300027623_22	d__Bacteria;p__Bacteroidota;c__Bacteroidia;o__Flavobacteriales;f__Flavobacteriaceae;g__Algibacter_B;s__	89.22	2.4	3303461	0	0	0	36	2951	90
3300027623	3300027623_23	d__Bacteria;p__Bacteroidota;c__Bacteroidia;o__Chitinophagales;f__Saprospiraceae;g__;s__	62.58	0.99	3239618	0	0	0	12	2661	420
3300027623	3300027623_24	d__Bacteria;p__Proteobacteria;c__Gammaproteobacteria;o__Granulosicoccales;f__Granulosicoccaceae;g__Granulosicoccus;s__	67.8	2.49	3095406	1	1	1	19	3086	517
3300027623	3300027623_25	d__Bacteria;p__Actinobacteriota;c__Acidimicrobiia;o__Microtrichales;f__UBA10347;g__;s__	57.26	0.85	3007418	0	0	0	34	2715	116
3300027623	3300027623_27	d__Bacteria;p__Bacteroidota;c__Bacteroidia;o__Chitinophagales;f__;g__;s__	66.86	8.86	2804104	0	0	0	27	2829	468
3300027623	3300027623_28	d__Bacteria;p__Proteobacteria;c__Alphaproteobacteria;o__Caulobacterales;f__Maricaulaceae;g__Hellea;s__	81.35	7.44	2731884	1	0	1	38	2884	334
3300027623	3300027623_32	d__Bacteria;p__Actinobacteriota;c__Acidimicrobiia;o__Microtrichales;f__SZUA-35;g__;s__	86.61	2.56	2130455	1	1	1	36	2332	212
3300027623	3300027623_6	d__Bacteria;p__Proteobacteria;c__Gammaproteobacteria;o__Granulosicoccales;f__Granulosicoccaceae;g__;s__	93.1	8.46	6615454	2	0	1	26	6489	590
3300027623	3300027623_8	d__Bacteria;p__Proteobacteria;c__Gammaproteobacteria;o__Granulosicoccales;f__Granulosicoccaceae;g__Granulosicoccus;s__	92.7	6.15	5560898	1	0	0	35	5234	216
3300027623	3300027623_9	d__Bacteria;p__Proteobacteria;c__Gammaproteobacteria;o__Granulosicoccales;f__Granulosicoccaceae;g__Granulosicoccus;s__	89.92	3.24	5381738	1	1	1	36	5037	221
